# Supplementary material for: Phytocannabinoid Compositions from Cannabis Act Synergistically with PARP1 Inhibitor against Ovarian Cancer Cells In Vitro and Affect the Wnt Signaling Pathway
Source: MDPI journal article supplement (doi:10.3390/molecules27217523), 2022-11-03
Supplement: s1 [file s1]

Supplementary Data

# Phytocannabinoid compositions from cannabis act synergistically with PARP1 inhibitor against ovarian cancer cells in vitro and affect the Wnt signaling pathway

Nurit Shalev<sup>1,2</sup>, Michelle Kendall<sup>3</sup>, Seegehalli M Anil<sup>2</sup>, Sudeep Tiwari<sup>2</sup>, Hadar Peeri<sup>1,2</sup>, Navin Kumar<sup>2</sup>, Eduard Blausov<sup>1</sup>, Ajjampura C Vinayaka<sup>2</sup> and Hinanit Koltai<sup>2,\*</sup>

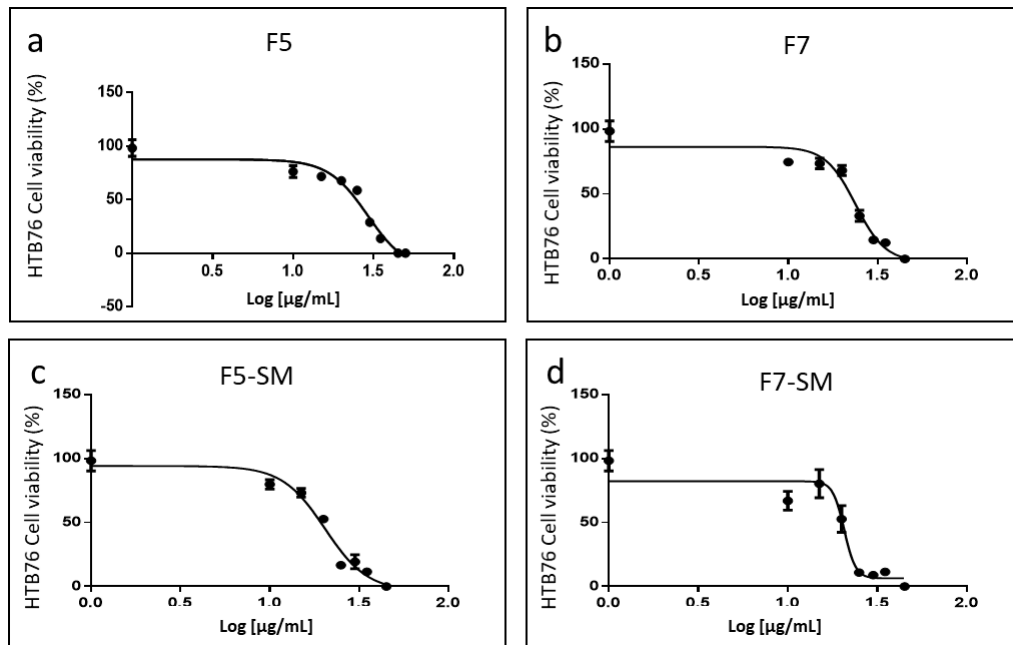

**Figure S1.** Cell viability of HTB76 cells following treatment with *C. sativa* DQ fraction F5 (a), F7 (b), F5-SM (c) and F7-SM (d) at different concentrations. The IC<sub>50</sub> values were calculated from 5P logistic curve fit using GraphPad Prism version 6.1. Error bars indicate ± SE ( $n=3$ ). Concentration 0 is a vehicle-treated control (3.50% v/v methanol).

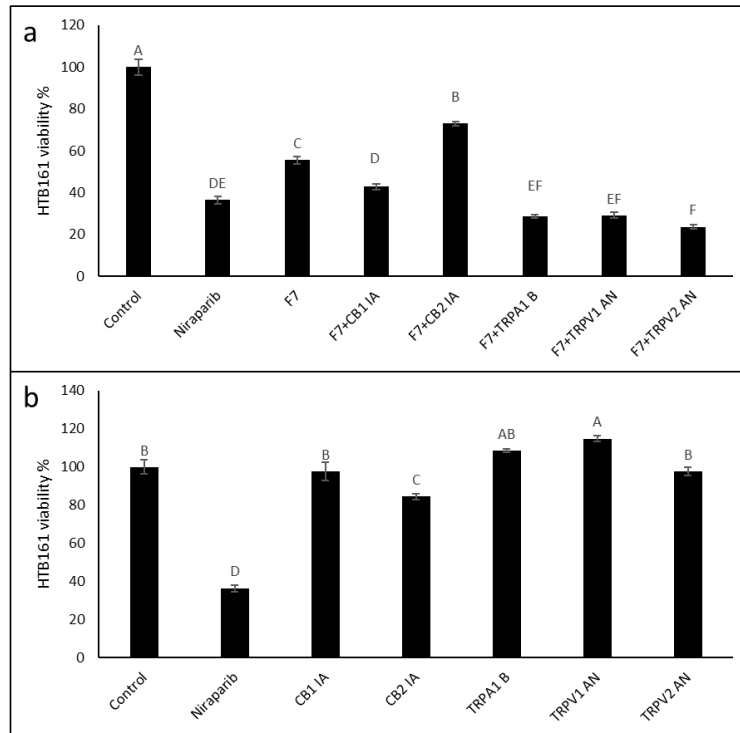

**Figure S2.** Cell viability of HTB161 cells following treatment with F7, with or without CB1 and CB2 inverse agonists (IA), a TRPA1 blocker (B), and TRPV1 or TRPV2 antagonists (AN) for 48 h. Cells were treated with F7 (24.46  $\mu\text{g/mL}$ ), with or without the receptor IA, B or AN (10  $\mu\text{M}$ ) (a). The effect of IA, B or NA on cell viability (b). Cell viability was determined by XTT assay as a function of live cell number. Niraparib (24.75  $\mu\text{g/mL}$ ) served as a positive control. Control is vehicle control (1.23% v/v methanol + 1.00% DMSO). Error bars indicate  $\pm$  SE ( $n=3$ ). Levels with different Upper case letters are significantly different from all combinations of pairs according to the Tukey–Kramer honest significant difference (HSD;  $P \leq 0.05$ ).

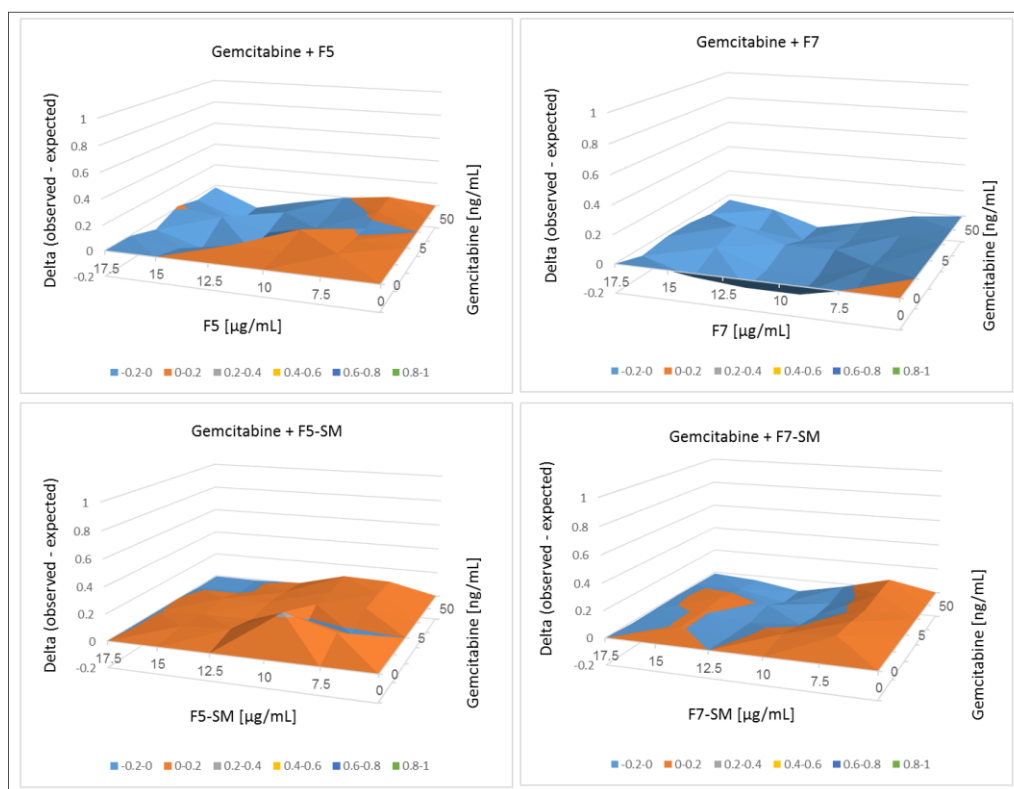

**Figure S3.** Synergistic interactions between F5, F7, F5-SM or F7-SM with gemcitabine on cell viability of HTB75 cells following combined treatments. Control is the vehicle control (1.75% v/v methanol + 0.05% v/v DMSO). Synergy of cytotoxic activity calculated based on the Bliss independence drug interaction model. Synergy is apparent when the experimental (observed) value of cell survival inhibition is higher than the calculated (expected) value. Values of delta of observed minus expected are shown in the Y axis. In Supplementary Table S6 are the different Upper case letters that signify different levels of the delta values from all combinations of pairs according to the Tukey–Kramer honest significant difference test ( $n=3$ ; HSD;  $P \leq 0.05$ ), for the synergistic delta values of F5, F7, F5-SM or F7-SM with gemcitabine.

**Table S1.** The F7 composition of terpenes.

| Compound             | % of total compounds in F7 |
|----------------------|----------------------------|
| D-Limonene           | 0.37                       |
| $\alpha$ Bergamotene | 3.62                       |
| Caryophyllene        | 62.64                      |
| (-)-Guaia-6,9-diene  | 0.59                       |
| $\gamma$ Gurjunene   | 0.46                       |
| $\gamma$ Muurolene   | 1.90                       |
| onaphthalene         | 2.24                       |
| $\alpha$ selinene    | 1.86                       |
| $\beta$ selinene     | 5.29                       |
| Bicyclogermacrene    | 2.26                       |
| Cadina-1(10),4-diene | 0.51                       |
| $\alpha$ Guaiene     | 1.15                       |
| $\beta$ Guaiene      | 6.08                       |
| Alloaromadendrene    | 1.28                       |

|                      |      |
|----------------------|------|
| Selina-3,7(11)-diene | 7.92 |
| β maaliene           | 1.85 |

**Table S2.** Summary of IC50 values determined at different time points of treatments at the 3 cell lines (HTB75, HTB161 and HTB76).

| HTB75 IC50 values (µg/mL)     |       |       |       |       |           |           |
|-------------------------------|-------|-------|-------|-------|-----------|-----------|
| Incubation time (h)/treatment | DQ    | F5    | F7    | F5-SM | F7-SM     | Niraparib |
| 24                            |       | 18.90 | 17.17 |       |           | 6.00      |
| 48                            | 21.51 | 18.36 | 16.95 | 14.67 | 13.56     | 5.10      |
| 72                            |       | 14.31 | 13.70 |       |           | 3.67      |
| HTB161 IC50 values (µg/mL)    |       |       |       |       |           |           |
| Incubation time (h)/treatment | F5    | F7    | F5-SM | F7-SM | Niraparib |           |
| 24                            | 37.87 | 30.46 |       |       | 37.53     |           |
| 48                            | 26.26 | 24.46 | 25.11 | 25.09 | 24.75     |           |
| 72                            | 25.34 | 17.66 |       |       | 18.00     |           |
| HTB76 IC50 values (µg/mL)     |       |       |       |       |           |           |
| Incubation time (h)/treatment | F5    | F7    | F5-SM | F7-SM | Niraparib |           |
| 48                            | 29.12 | 23.79 | 20.38 | 20.66 | 27.83     |           |

**Table S3.** Treatment layout with THC, CBG, CBC and CBN standards on the HTB75 cell line (µg/mL).

| F7          |      |      |      |      |      |      |      |  | F5   |      |      |
|-------------|------|------|------|------|------|------|------|--|------|------|------|
| THC         | 13.0 | 9.8  | 12.8 | 12.8 | 9.7  | 9.7  | 12.6 |  | 12.4 | 12.5 | 11.9 |
| CBC         |      | 3.2  |      |      | 3.2  | 3.2  |      |  |      |      |      |
| CBN         |      |      | 0.2  |      | 0.2  |      | 0.2  |  | 0.6  |      | 0.6  |
| CBG         |      |      |      | 0.2  |      | 0.1  | 0.2  |  |      | 0.5  | 0.5  |
| Total µg/mL | 13.0 | 13.0 | 13.0 | 13.0 | 13.0 | 13.0 | 13.0 |  | 13.0 | 13.0 | 13.0 |
| F7          |      |      |      |      |      |      |      |  | F5   |      |      |
| THC         | 15.0 | 11.3 | 14.8 | 14.8 | 11.1 | 11.2 | 14.5 |  | 14.3 | 14.4 | 13.8 |
| CBC         |      | 3.7  |      |      | 3.7  | 3.7  |      |  |      |      |      |
| CBN         |      |      | 0.2  |      | 0.2  |      | 0.2  |  | 0.7  |      | 0.6  |
| CBG         |      |      |      | 0.2  |      | 0.2  | 0.2  |  |      | 0.6  | 0.6  |
| Total µg/mL | 15.0 | 15.0 | 15.0 | 15.0 | 15.0 | 15.0 | 15.0 |  | 15.0 | 15.0 | 15.0 |

**Table S4.** Different Upper case letters signify delta values that are significantly different from all combinations of pairs according to Tukey–Kramer honest significant difference (HSD;  $P \leq 0.05$ ). Delta values calculated according to the Bliss model between the experimental (observed) and the calculated (expected) values of the synergistic interactions between F5, F7, F5-SM or F7-SM and niraparib on cell viability of HTB75 cells following combined treatments. Delta values are graphically presented in Figure 7.

|                                |    | F5 [ $\mu\text{g/mL}$ ]    |        |       |       |        |       |
|--------------------------------|----|----------------------------|--------|-------|-------|--------|-------|
|                                |    | 0                          | 7.5    | 10    | 12.5  | 15     | 17.5  |
|                                |    |                            |        |       |       |        |       |
| Niraparib [ $\mu\text{g/mL}$ ] | 0  | FGH                        | FGH    | FGH   | FGH   | FGH    | FGH   |
|                                | 1  | FGH                        | DEFG   | FGH   | FG    | CDEF   | GH    |
|                                | 2  | FGH                        | FGH    | FGH   | FGH   | DEF    | FG    |
|                                | 3  | FGH                        | FGH    | EFG   | FGH   | FGH    | FGH   |
|                                | 4  | FGH                        | FGH    | DEF   | FGH   | DEFG   | H     |
|                                | 6  | FGH                        | H      | FGH   | FGH   | BC     | BCD   |
|                                | 7  | FGH                        | N/A    | N/A   | N/A   | A      | AB    |
|                                | 8  | FGH                        | N/A    | N/A   | N/A   | AB     | BCDE  |
|                                | 9  | FGH                        | N/A    | N/A   | N/A   | FG     | FG    |
|                                | 10 | FGH                        | N/A    | N/A   | N/A   | FGH    | FGH   |
|                                |    | F7 [ $\mu\text{g/mL}$ ]    |        |       |       |        |       |
|                                |    | 0                          | 7.5    | 10    | 12.5  | 15     | 17.5  |
|                                |    |                            |        |       |       |        |       |
| Niraparib [ $\mu\text{g/mL}$ ] | 0  | GHIJ                       | GHIJ   | GHIJ  | GHIJ  | GHIJ   | GHIJ  |
|                                | 1  | GHIJ                       | GHIJ   | EFGH  | IJ    | HIJ    | CDEFG |
|                                | 2  | GHIJ                       | GHI    | GHI   | HIJ   | FGHI   | BCDEF |
|                                | 3  | GHIJ                       | FGH    | HIJ   | GHIJ  | BC     | BC    |
|                                | 4  | GHIJ                       | EFGH   | HIJ   | GHIJ  | BCD    | BC    |
|                                | 6  | GHIJ                       | HIJ    | J     | HIJ   | AB     | B     |
|                                | 7  | GHIJ                       | N/A    | N/A   | N/A   | A      | AB    |
|                                | 8  | GHIJ                       | N/A    | N/A   | N/A   | AB     | BCDE  |
|                                | 9  | GHIJ                       | N/A    | N/A   | N/A   | DEFGH  | EFGH  |
|                                | 10 | GHIJ                       | N/A    | N/A   | N/A   | GHI    | GHI   |
|                                |    | F5-SM [ $\mu\text{g/mL}$ ] |        |       |       |        |       |
|                                |    | 0                          | 7.5    | 10    | 12.5  | 15     |       |
|                                |    |                            |        |       |       |        |       |
| Niraparib [ $\mu\text{g/mL}$ ] | 0  | HI                         | HI     | HI    | HI    | HI     |       |
|                                | 4  | HI                         | EFGHI  | CDEF  | A     | GHI    |       |
|                                | 6  | HI                         | IJ     | J     | BCD   | HIJ    |       |
|                                | 7  | HI                         | BC     | AB    | A     | CDEFGH |       |
|                                | 8  | HI                         | HI     | CDEFG | CDE   | FGHI   |       |
|                                | 9  | HI                         | HI     | DEFGH | DEFGH | HI     |       |
|                                |    | F7-SM [ $\mu\text{g/mL}$ ] |        |       |       |        |       |
|                                |    | 0                          | 7.5    | 10    | 12.5  | 15     |       |
|                                |    |                            |        |       |       |        |       |
| Niraparib [ $\mu\text{g/mL}$ ] | 0  | G                          | G      | G     | G     | G      |       |
|                                | 4  | G                          | ABCDEF | ABC   | AB    | ABCDE  |       |
|                                | 6  | G                          | ABC    | ABCD  | A     | BCDEFG |       |
|                                | 7  | G                          | ABC    | AB    | ABC   | BCDEFG |       |
|                                | 8  | G                          | CDEFG  | ABCDE | CDEFG | CDEFG  |       |
|                                | 9  | G                          | FG     | H     | DEFG  | EFG    |       |

**Table S5.** Different Upper case letters signify delta values that are significantly different from all combinations of pairs according to Tukey–Kramer honest significant difference (HSD;  $P \leq 0.05$ ). Delta values calculated according to Bliss model between the experimental (observed) and the calculated (expected) values of the synergistic interactions between F5 or F7 and niraparib on cell viability of HTB161 cells following combined treatments. Delta values are graphically presented in Figure 7.

|                                |      | F5 [ $\mu\text{g/mL}$ ] |      |       |       |       |       |
|--------------------------------|------|-------------------------|------|-------|-------|-------|-------|
|                                |      | 0                       | 15   | 17.5  | 20    | 22.5  | 25    |
| Niraparib [ $\mu\text{g/mL}$ ] | 0    | CDEF                    | CDEF | CDEF  | CDEF  | CDEF  | CDEF  |
|                                | 4    | CDEF                    | ABC  | ABC   | A     | ABC   | EFGHI |
|                                | 8    | CDEF                    | BCD  | BCDEF | DEFG  | CDEF  | GHI   |
|                                | 12   | CDEF                    | A    | DEFGH | CDEF  | BCDEF | GHI   |
|                                | 16   | CDEF                    | BCDE | DEFG  | FGHI  | EFGHI | I     |
|                                | 20   | CDEF                    | BCD  | DEFG  | EFGHI | DEFGH | HI    |
|                                |      | F7 [ $\mu\text{g/mL}$ ] |      |       |       |       |       |
|                                |      | 0                       | 17.5 | 20    | 22.5  | 25    | 27.5  |
| Niraparib [ $\mu\text{g/mL}$ ] | 0    | CD                      | CDE  | CDE   | CDE   | CD    | CD    |
|                                | 10   | CDE                     | ABC  | CD    | E     | CD    | CDE   |
|                                | 15   | CD                      | CD   | ABC   | DE    | BC    | CDE   |
|                                | 20   | CDE                     | ABC  | CDE   | CDE   | ABC   | C     |
|                                | 25   | CD                      | AB   | A     | CD    | C     | BC    |
|                                | 27.5 | CD                      | ABC  | ABC   | CD    | CD    | CD    |

**Table S6.** Different Upper case letters signify delta values that are significantly different from all combinations of pairs according to Tukey–Kramer honest significant difference (HSD;  $P \leq 0.05$ ). Delta values calculated according to Bliss model between the experimental (observed) and the calculated (expected) values of the synergistic interactions between F5, F7, F5-SM or F7-SM and gemcitabine on cell viability of HTB75 cells following combined treatments. Delta values are graphically presented in Supplementary Figure S3.

|                     |     | F5 [ $\mu\text{g/mL}$ ]    |        |        |        |        |         |
|---------------------|-----|----------------------------|--------|--------|--------|--------|---------|
|                     |     | 0                          | 7.5    | 10     | 12.5   | 15     | 17.5    |
| Gemcitabine [ng/mL] | 0   | ABCDE                      | ABCDE  | ABCDE  | ABCDE  | ABCDE  | ABCDE   |
|                     | 2.5 | ABCDE                      | AB     | ABCD   | ABCD   | EFGH   | ABCDEF  |
|                     | 5   | ABCDE                      | ABCD   | A      | J      | J      | GHI     |
|                     | 10  | ABCDE                      | BCDEFG | DEFGH  | IJ     | CDEFGH | ABC     |
|                     | 50  | ABCDE                      | ABC    | CDEFGH | FGHI   | J      | CDEFGH  |
|                     | 100 | ABCDE                      | AB     | ABCDEF | HI     | J      | BCDEFGH |
|                     |     | F7 [ $\mu\text{g/mL}$ ]    |        |        |        |        |         |
|                     |     | 0                          | 7.5    | 10     | 12.5   | 15     | 17.5    |
| Gemcitabine [ng/mL] | 0   | A                          | A      | A      | A      | A      | A       |
|                     | 2.5 | A                          | DEF    | IJ     | K      | FGH    | ABCD    |
|                     | 5   | A                          | BCD    | HI     | JK     | ABCD   | ABC     |
|                     | 10  | A                          | CDE    | DEF    | DEFG   | AB     | ABC     |
|                     | 50  | A                          | BCD    | EFGH   | IJK    | GHI    | ABCD    |
|                     | 100 | A                          | ABC    | DEFG   | HI     | CDE    | ABC     |
|                     |     | F5-SM [ $\mu\text{g/mL}$ ] |        |        |        |        |         |
|                     |     | 0                          | 7.5    | 10     | 12.5   | 15     | 17.5    |
| Gemcitabine [ng/mL] | 0   | BC                         | BC     | BC     | BC     | BC     | BC      |
|                     | 2.5 | BC                         | AB     | A      | BC     | BC     | BC      |
|                     | 5   | BC                         | BC     | C      | BC     | BC     | BC      |
|                     | 10  | BC                         | ABC    | ABC    | BC     | BC     | BC      |
|                     | 50  | BC                         | AB     | ABC    | BC     | BC     | BC      |
|                     | 100 | BC                         | AB     | AB     | BC     | BC     | BC      |
|                     |     | F7-SM [ $\mu\text{g/mL}$ ] |        |        |        |        |         |
|                     |     | 0                          | 7.5    | 10     | 12.5   | 15     | 17.5    |
| Gemcitabine [ng/mL] | 0   | CDEFGH                     | CDEFGH | CDEFGH | CDEFGH | CDEFGH | CDEFGH  |
|                     | 2.5 | CDEFGH                     | A      | ABCD   | EFGHI  | BCDEFG | DEFGHI  |
|                     | 5   | CDEFGH                     | AB     | DEFGHI | FGHIJ  | BCDEFG | DEFGHI  |
|                     | 10  | CDEFGH                     | ABCDE  | HIJK   | DEFGHI | ABCDEF | DEFGHI  |
|                     | 50  | CDEFGH                     | ABC    | IJK    | JK     | DEFGHI | DEFGHI  |
|                     | 100 | CDEFGH                     | A      | EFGHI  | K      | GHIJ   | DEFGHI  |
